# Supplementary material
Source: Springer Nature journal article supplement (https://www.springermedizin.de/resource/supplementary/12890_2008_109_MOESM2_ESM.pdf/9506004)

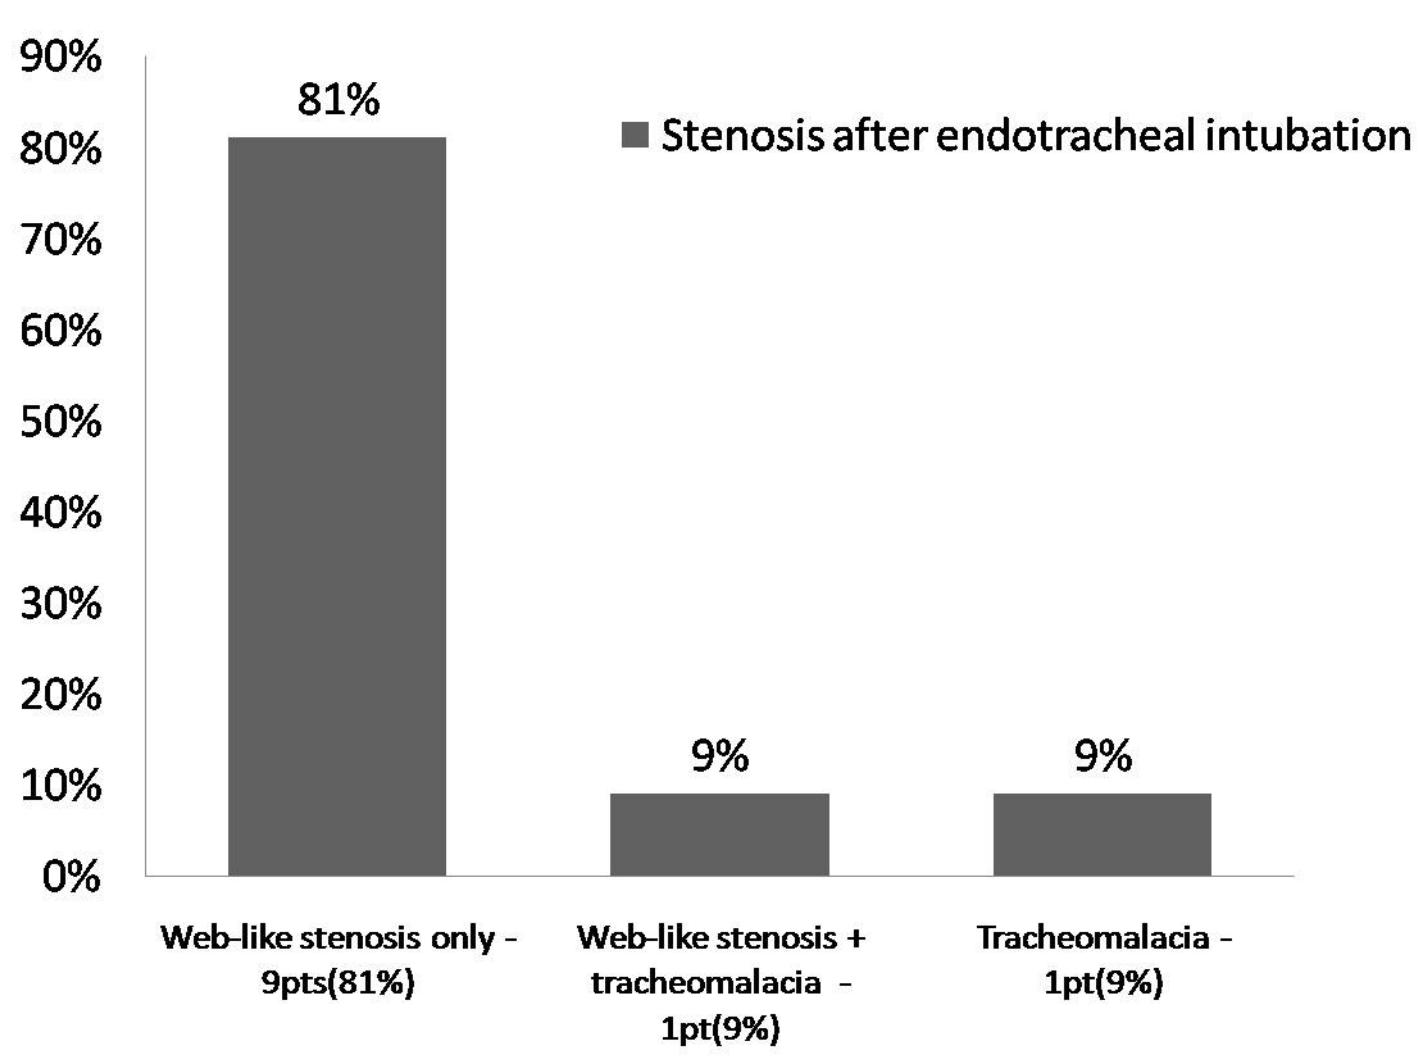

Supplement: MOESM2 [file 9506004]
